# Supplementary material for: Nitrate Removal and Woodchip Properties across a Paired Denitrifying Bioreactor Treating Centralized Agricultural Ditch Flows
Source: MDPI journal article supplement (doi:10.3390/w14010056), 2021-12-28
Supplement: s1 [file s1]

Archive with 1 entries (1 files):
- water-1514314-supplementary.pdf
